# Supplementary material for: Systematic Comparison of Muscle Ultrasound Thickness in Polyneuropathies and Other Neuromuscular Diseases
Source: Springer Nature journal article supplement (doi:10.1007/s40120-023-00485-6), 2023-06-20
Supplement: MOESM1 [file 25516750]

## Supplementary Material

### **Systematic comparison of muscle ultrasound thickness in polyneuropathies and other neuromuscular diseases**

Sara A Alnajjar<sup>1,2,3</sup>, Davood Fathihelabad<sup>1,2</sup>, Alon Abraham<sup>4,5</sup>, Lubna Daniyal<sup>1,2</sup>, Leif Erik Lovblom<sup>2</sup> and Vera Bril<sup>1,2</sup>

<sup>1</sup> Ellen & Martin Prosserman Centre for Neuromuscular Diseases, Toronto General Hospital, University Health Network, Toronto, Canada

<sup>2</sup> University of Toronto, Toronto, Canada

<sup>3</sup> King Abdulaziz Hospital, Ministry of national guard health affair, Al Ahsa, Saudi Arabia

<sup>4</sup> Neuromuscular Diseases Unit, Department of Neurology, Tel Aviv Sourasky Medical Center, Tel Aviv, Israel

<sup>5</sup> Sackler Faculty of Medicine, Tel-Aviv University, Tel-Aviv, Israel

Corresponding Author:

Vera Bril, 5EC-309, Toronto General Hospital, 200 Elizabeth St, Toronto, Ontario, Canada

Phone: 1-416-340-3315

Fax: 1-416-340-4189

Email: [vera.bril@utoronto.ca](mailto:vera.bril@utoronto.ca)

**Supplementary Table 1a. Adjusted p-values for comparisons of muscle US thickness in males between healthy control, CIDP, polyneuropathy and other NMD. Right side only.**

| <b>Muscle</b>   |                   | <b>CIDP</b> | <b>Neuropathy</b> | <b>Other NM</b> | <b>Control</b> |
|-----------------|-------------------|-------------|-------------------|-----------------|----------------|
| <b>APB C</b>    | <b>CIDP</b>       | -           | 0.9634            | 0.9893          | 0.0014         |
|                 | <b>Neuropathy</b> | 0.9634      | -                 | 0.9996          | 0.017          |
|                 | <b>Other NM</b>   | 0.9893      | 0.9996            | -               | 0.0125         |
|                 | <b>Control</b>    | 0.0014      | 0.017             | 0.0125          | -              |
| <b>APB R</b>    | <b>CIDP</b>       | -           | 0.9916            | 0.9537          | 0.0012         |
|                 | <b>Neuropathy</b> | 0.9916      | -                 | 0.9941          | 0.0093         |
|                 | <b>Other NM</b>   | 0.9537      | 0.9941            | -               | 0.0215         |
|                 | <b>Control</b>    | 0.0012      | 0.0093            | 0.0215          | -              |
| <b>Biceps C</b> | <b>CIDP</b>       | -           | 0.9776            | 1               | 0.8125         |
|                 | <b>Neuropathy</b> | 0.9776      | -                 | 0.9806          | 0.9752         |
|                 | <b>Other NM</b>   | 1           | 0.9806            | -               | 0.8331         |
|                 | <b>Control</b>    | 0.8125      | 0.9752            | 0.8331          | -              |
| <b>Biceps R</b> | <b>CIDP</b>       | -           | 0.4156            | 1               | 0.966          |
|                 | <b>Neuropathy</b> | 0.4156      | -                 | 0.5503          | 0.2382         |
|                 | <b>Other NM</b>   | 1           | 0.5503            | -               | 0.9758         |
|                 | <b>Control</b>    | 0.966       | 0.2382            | 0.9758          | -              |
| <b>ADM</b>      | <b>CIDP</b>       | -           | 0.4807            | 0.1085          | 0.029          |
|                 | <b>Neuropathy</b> | 0.4807      | -                 | 0.7589          | 0.001          |
|                 | <b>Other NM</b>   | 0.1085      | 0.7589            | -               | <.0001         |
|                 | <b>Control</b>    | 0.029       | 0.001             | <.0001          | -              |
| <b>FDI</b>      | <b>CIDP</b>       | -           | 0.4035            | 0.9959          | 0.2921         |
|                 | <b>Neuropathy</b> | 0.4035      | -                 | 0.6789          | 0.9994         |

|               |                   |        |        |        |        |
|---------------|-------------------|--------|--------|--------|--------|
| <b>Quad R</b> | <b>Other NM</b>   | 0.9959 | 0.6789 | -      | 0.5246 |
|               | <b>Control</b>    | 0.2921 | 0.9994 | 0.5246 | -      |
|               | <b>CIDP</b>       | -      | 1      | 0.9778 | 0.0508 |
|               | <b>Neuropathy</b> | 1      | -      | 0.9842 | 0.0971 |
| <b>Quad C</b> | <b>Other NM</b>   | 0.9778 | 0.9842 | -      | 0.2207 |
|               | <b>Control</b>    | 0.0508 | 0.0971 | 0.2207 | -      |
|               | <b>CIDP</b>       | -      | 0.9826 | 0.9727 | <.0001 |
|               | <b>Neuropathy</b> | 0.9826 | -      | 0.9996 | 0.0003 |
| <b>TA R</b>   | <b>Other NM</b>   | 0.9727 | 0.9996 | -      | 0.0005 |
|               | <b>Control</b>    | <.0001 | 0.0003 | 0.0005 | -      |
|               | <b>CIDP</b>       | -      | 0.6767 | 0.8727 | 0.8853 |
|               | <b>Neuropathy</b> | 0.6767 | -      | 0.3378 | 0.9767 |
| <b>TA C</b>   | <b>Other NM</b>   | 0.8727 | 0.3378 | -      | 0.4593 |
|               | <b>Control</b>    | 0.8853 | 0.9767 | 0.4593 | -      |
|               | <b>CIDP</b>       | -      | 0.7515 | 0.8461 | 0.2785 |
|               | <b>Neuropathy</b> | 0.7515 | -      | 0.3647 | 0.9012 |
| <b>AH</b>     | <b>Other NM</b>   | 0.8461 | 0.3647 | -      | 0.0667 |
|               | <b>Control</b>    | 0.2785 | 0.9012 | 0.0667 | -      |
|               | <b>CIDP</b>       | -      | 0.6242 | 0.7218 | <.0001 |
|               | <b>Neuropathy</b> | 0.6242 | -      | 0.1837 | <.0001 |
| <b>EDB</b>    | <b>Other NM</b>   | 0.7218 | 0.1837 | -      | <.0001 |
|               | <b>Control</b>    | <.0001 | <.0001 | <.0001 | -      |
|               | <b>CIDP</b>       | -      | 0.6583 | 0.7247 | <.0001 |
|               | <b>Neuropathy</b> | 0.6583 | -      | 1      | <.0001 |
|               | <b>Other NM</b>   | 0.7247 | 1      | -      | <.0001 |
|               | <b>Control</b>    | <.0001 | <.0001 | <.0001 | -      |

**Supplementary Table 1b. Adjusted p-values for comparison in females between healthy control, CIDP, polyneuropathy and other NMD. Right side only.**

| <b>Muscle</b>   |                   | <b>CIDP</b> | <b>Neuropathy</b> | <b>Other NM</b> | <b>Control</b> |
|-----------------|-------------------|-------------|-------------------|-----------------|----------------|
| <b>APB C</b>    | <b>CIDP</b>       | -           | 0.9923            | 0.9602          | 0.1918         |
|                 | <b>Neuropathy</b> | 0.9923      | -                 | 0.9876          | 0.0391         |
|                 | <b>Other NM</b>   | 0.9602      | 0.9876            | -               | 0.0993         |
|                 | <b>Control</b>    | 0.1918      | 0.0391            | 0.0993          | -              |
| <b>APB R</b>    | <b>CIDP</b>       | -           | 0.9899            | 0.9676          | 0.1442         |
|                 | <b>Neuropathy</b> | 0.9899      | -                 | 0.9954          | 0.001          |
|                 | <b>Other NM</b>   | 0.9676      | 0.9954            | -               | 0.0005         |
|                 | <b>Control</b>    | 0.1442      | 0.001             | 0.0005          | -              |
| <b>Biceps C</b> | <b>CIDP</b>       | -           | 0.7               | 0.6079          | .9876          |
|                 | <b>Neuropathy</b> | 0.7         | -                 | 0.9956          | 0.0739         |
|                 | <b>Other NM</b>   | 0.6079      | 0.9956            | -               | 0.043          |
|                 | <b>Control</b>    | 0.9876      | 0.0739            | 0.043           | -              |
| <b>Biceps R</b> | <b>CIDP</b>       | -           | 0.7928            | 0.9976          | 0.6966         |
|                 | <b>Neuropathy</b> | 0.7928      | -                 | 0.6787          | 0.9988         |
|                 | <b>Other NM</b>   | 0.9976      | 0.6787            | -               | 0.4859         |
|                 | <b>Control</b>    | 0.6966      | 0.9988            | 0.4859          | -              |
| <b>ADM</b>      | <b>CIDP</b>       | -           | 0.8999            | 0.9371          | 0.0047         |
|                 | <b>Neuropathy</b> | 0.8999      | -                 | 0.9984          | 0.0002         |
|                 | <b>Other NM</b>   | 0.9371      | 0.9984            | -               | .0001          |
|                 | <b>Control</b>    | 0.0047      | 0.0002            | .0001           | -              |
| <b>FDI</b>      | <b>CIDP</b>       | -           | 0.0979            | 0.0936          | 0.0095         |
|                 | <b>Neuropathy</b> | 0.0979      | -                 | 1               | 0.6545         |

|               |                   |        |        |        |        |
|---------------|-------------------|--------|--------|--------|--------|
| <b>Quad R</b> | <b>Other NM</b>   | 0.0936 | 1      | -      | 0.695  |
|               | <b>Control</b>    | 0.0095 | 0.6545 | 0.695  | -      |
|               | <b>CIDP</b>       | -      | 0.9301 | 0.2725 | 0.5204 |
|               | <b>Neuropathy</b> | 0.9301 | -      | 0.2538 | 0.6433 |
| <b>Quad C</b> | <b>Other NM</b>   | 0.2725 | 0.2538 | -      | 0.7626 |
|               | <b>Control</b>    | 0.5204 | 0.6433 | 0.7626 | -      |
|               | <b>CIDP</b>       | -      | 0.8019 | 0.4118 | 0.0909 |
|               | <b>Neuropathy</b> | 0.8019 | -      | 0.7528 | 0.6821 |
| <b>TA R</b>   | <b>Other NM</b>   | 0.4118 | 0.7528 | -      | 0.6821 |
|               | <b>Control</b>    | 0.0909 | 0.1097 | 0.6821 | -      |
|               | <b>CIDP</b>       | -      | 0.0239 | 0.0143 | 0.0008 |
|               | <b>Neuropathy</b> | 0.0239 | -      | 0.9911 | 0.4754 |
| <b>TA C</b>   | <b>Other NM</b>   | 0.0143 | 0.9911 | -      | 0.6999 |
|               | <b>Control</b>    | 0.0008 | 0.4754 | 0.6999 | -      |
|               | <b>CIDP</b>       | -      | 0.003  | 0.0119 | <.0001 |
|               | <b>Neuropathy</b> | 0.003  | -      | 0.9044 | 0.2263 |
| <b>AH</b>     | <b>Other NM</b>   | 0.0119 | 0.9044 | -      | 0.0452 |
|               | <b>Control</b>    | <.0001 | 0.2263 | 0.0452 | -      |
|               | <b>CIDP</b>       | -      | 0.7325 | 0.7718 | <.0001 |
|               | <b>Neuropathy</b> | 0.7325 | -      | 0.9996 | <.0001 |
| <b>EDB</b>    | <b>Other NM</b>   | 0.7718 | 0.9996 | -      | <.0001 |
|               | <b>Control</b>    | <.0001 | <.0001 | <.0001 | -      |
|               | <b>CIDP</b>       | -      | 0.8551 | 0.609  | <.0001 |
|               | <b>Neuropathy</b> | 0.8551 | -      | 0.9092 | <.0001 |
|               | <b>Other NM</b>   | 0.609  | 0.9092 | -      | <.0001 |
|               | <b>Control</b>    | <.0001 | <.0001 | <.0001 | -      |

**Table 2a. Comparison of muscle thickness in males between healthy controls, CIDP, polyneuropathy and other NMD. Right side only.**

| Muscle          | Healthy       | CIDP                | Polyneuropathy       | Other NMD     |
|-----------------|---------------|---------------------|----------------------|---------------|
| <b>Biceps R</b> | 278.8 ± 50.3  | 292 ± 76            | 342.1 ± 63.47        | 318.9 ± 81.98 |
| <b>Biceps C</b> | 410.8 ± 56.57 | 377.5 ± 69.1        | 399.8 ± 45.11        | 408.5 ± 123.1 |
| <b>APB R</b>    | 48.87 ± 7.15  | 38.5 ± 9.17         | 40.66 ± 10.59        | 41.43 ± 6.64  |
| <b>APB C</b>    | 65.89 ± 10.76 | 51.6 ± 13.1         | 55.66 ± 15.57        | 54 ± 8.88     |
| <b>FDI</b>      | 125.3 ± 20.94 | 113.3 ± 23.2        | 128.7 ± 19           | 120.5 ± 18.89 |
| <b>ADM</b>      | 107.6 ± 18.79 | 88.5 ± 20.9         | 87.11 ± 19.28        | 80.75 ± 17.7  |
| <b>Quad R</b>   | 233.7 ± 51.71 | <b>187.3 ± 58.4</b> | <b>212.1 ± 45.71</b> | 241.5 ± 90.55 |
| <b>Quad C</b>   | 345.5 ± 67.83 | <b>246.8 ± 61.3</b> | <b>280.5 ± 51</b>    | 304.1 ± 111.9 |
| <b>TA R</b>     | 232.6 ± 25.57 | 226.8 ± 36.2        | 245.3 ± 40.65        | 226 ± 28.15   |
| <b>TA C</b>     | 290.3 ± 28.88 | 271.6 ± 40          | 289 ± 29.91          | 272.3 ± 32.66 |
| <b>AH</b>       | 127.9 ± 19.38 | <b>34.1 ± 11.5</b>  | <b>41 ± 15.32</b>    | 34 ± 12.48    |
| <b>EDB</b>      | 84.6 ± 12.4   | <b>35.7 ± 11</b>    | <b>43 ± 13.44</b>    | 46.3 ± 11.97  |

**Table 2b. Comparison of muscle thickness in females between healthy controls, CIDP, polyneuropathy and other NMD. Right side only.**

| Muscle          | Healthy        | CIDP                | Polyneuropathy       | Other NMD     |
|-----------------|----------------|---------------------|----------------------|---------------|
| <b>Biceps R</b> | 235.42 ± 46.92 | 204.4 ± 89.65       | 245.6 ± 74           | 213 ± 62.29   |
| <b>Biceps C</b> | 317 ± 40.7     | 298.6 ± 66.12       | 296.3 ± 68.21        | 275.5 ± 74.55 |
| <b>APB R</b>    | 41.3 ± 6.58    | 34.8 ± 1.78         | 33.37 ± 7.87         | 31.14 ± 8.58  |
| <b>APB C</b>    | 55.3 ± 11.16   | 41.6 ± 10.78        | 46.5 ± 10.78         | 45.5 ± 11.89  |
| <b>FDI</b>      | 105.7 ± 15.23  | <b>70.8 ± 20.24</b> | <b>103 ± 23.82</b>   | 98.21 ± 20.42 |
| <b>ADM</b>      | 91.39 ± 14.89  | <b>57 ± 26</b>      | <b>71.37 ± 20.68</b> | 66 ± 16.32    |

|               |               |                      |                      |               |
|---------------|---------------|----------------------|----------------------|---------------|
| <b>Quad R</b> | 200.6 ± 54.5  | <b>174.4 ± 46.61</b> | <b>185.3 ± 63.18</b> | 199.3 ± 55.97 |
| <b>Quad C</b> | 282.2 ± 57.61 | <b>220.2 ± 58.4</b>  | <b>237 ± 73.42</b>   | 241 ± 64      |
| <b>TA R</b>   | 199.9 ± 29.96 | 152 ± 43.59          | 195.5 ± 28.62        | 194.1 ± 36.62 |
| <b>TA C</b>   | 255.6 ± 30.81 | 181.4 ± 70.39        | 246 ± 40.84          | 230.2 ± 36.94 |
| <b>AH</b>     | 113.6 ± 18.96 | <b>24.8 ± 3.27</b>   | <b>33.75 ± 12.25</b> | 31.35 ± 12.21 |
| <b>EDB</b>    | 71.3 ± 13.21  | <b>28.4 ± 5.5</b>    | <b>33.5 ± 11.13</b>  | 35.35 ± 9.91  |
